# Supplementary material
Source: PubMed Central journal article supplement (PMC8464354)

**SUPPLEMENTAL**

**Figure 1.** The protocol called for four micro-samples to be collected at baseline (day 0) and again at time of exit (day 90) by a technician in-clinic. Additionally, subjects were provided two additional kits for remote blood collection at one month (day 30) and two months (day 60), to be returned to the clinic by mail with the option to drop off at the clinic in-person if needed.

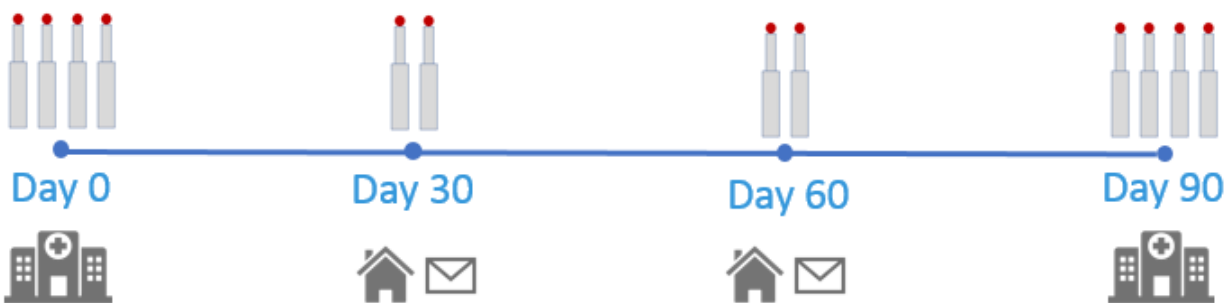

Supplement: NIHMS1593114-supplement-1.pdf [file NIHMS1593114-supplement-1.pdf]
